# Supplementary material for: Polymer-free nanofibers from vanillin/cyclodextrin inclusion complexes: high thermal stability, enhanced solubility and antioxidant property
Source: Royal Society of Chemistry journal article supplement (doi:10.1039/c6fo00569a), 2016-01-01
Supplement: c6fo00569a1.pdf [file c6fo00569a1.pdf]

**Polymer-free nanofibers from vanillin/cyclodextrin inclusion  
complexes: high thermal stability, enhanced solubility and  
antioxidant property**

Asli Celebioglu<sup>1,2</sup>, Fatma Kayaci-Senirmak<sup>1,2</sup>, Semran İpek Kusku<sup>2,3</sup>, Engin Durgun<sup>1,2</sup>, Tamer  
Uyar\*<sup>1,2</sup>

<sup>1</sup> *Institute of Materials Science & Nanotechnology, Bilkent University, Ankara, 06800, Turkey*

<sup>2</sup> *UNAM-National Nanotechnology Research Center, Bilkent University, Ankara, 06800, Turkey*

<sup>3</sup> *Department of Engineering Physics, Istanbul Medeniyet University, Istanbul, 34700, Turkey*

\*Corresponding author: Tel: +90-3122908987, e-mail: tamer@unam.bilkent.edu.tr

**Table S1.** DSC results including enthalpy changes ( $\Delta H$  (J/g)) and peak temperature values ( $^{\circ}\text{C}$ ) during the dehydration process of water.  $^1\text{H-NMR}$  calculations indicating the vanillin amount in CD-IC NF in terms of molar ratio (vanillin:CD)/% (w/w) comparatively with their initial values.

| Samples                             | DSC Results                   |                                         | $^1\text{H-NMR}$ Results                                         |                                                                   |
|-------------------------------------|-------------------------------|-----------------------------------------|------------------------------------------------------------------|-------------------------------------------------------------------|
|                                     | $\Delta H$ (J/g) <sup>a</sup> | Peak temperature ( $^{\circ}\text{C}$ ) | Initial-vanillin (vanillin:CD;molar ratio - %;w/w <sup>b</sup> ) | Measured-vanillin (vanillin:CD;molar ratio - %;w/w <sup>b</sup> ) |
| vanillin/HP $\beta$ CD-IC-water-NF  | 161 - 327*                    | 98 - 93*                                | 0.94:1 - 9.8                                                     | 0.75:1 - 7.64                                                     |
| vanillin/HP $\beta$ CD-IC-DMF-NF    | 120 - 177*                    | 96 - 95*                                | 0.94:1 - 9.8                                                     | 0.63:1 - 6.49                                                     |
| vanillin/HP $\beta$ CD-IC-DMAc-NF   | 122 - 179*                    | 96 - 89*                                | 0.94:1 - 9.8                                                     | 0.55:1 - 5.71                                                     |
| vanillin/HP $\gamma$ CD-IC-water-NF | 157 - 247*                    | 109 - 92*                               | 0.97:1 - 8.9                                                     | 0.77:1 - 6.90                                                     |
| vanillin/HP $\gamma$ CD-IC-DMF-NF   | 142 - 322*                    | 111 - 93*                               | 0.96:1 - 8.8                                                     | 0.72:1 - 6.48                                                     |
| vanillin/HP $\gamma$ CD-IC-DMAc-BNF | 192 - 256*                    | 114 - 107*                              | 0.96:1 - 8.8                                                     | 0.40:1 - 3.71                                                     |
| vanillin/M $\beta$ CD-IC-water-NF   | 74 - 90*                      | 102 - 101*                              | 1.14:1 - 12.3                                                    | 1.00:1 - 10.4                                                     |
| vanillin/M $\beta$ CD-IC-DMF-NF     | 56 - 101*                     | 96 - 89*                                | 1.14:1 - 12.3                                                    | 1.00:1 - 10.4                                                     |
| vanillin/M $\beta$ CD-IC-DMAc-NF    | 42 - 189*                     | 100 - 96*                               | 1.14:1 - 12.3                                                    | 0.93:1 - 9.74                                                     |

<sup>a</sup> Calculated in the range of 30-150  $^{\circ}\text{C}$ .

<sup>b</sup> For the amount of vanillin calculated in terms of %, w/w is respect to total sample amount.

\* Marked  $\Delta H$  values belong to pure HP $\beta$ CD, HP $\gamma$ CD and M $\beta$ CD NF obtained from previous report [29].

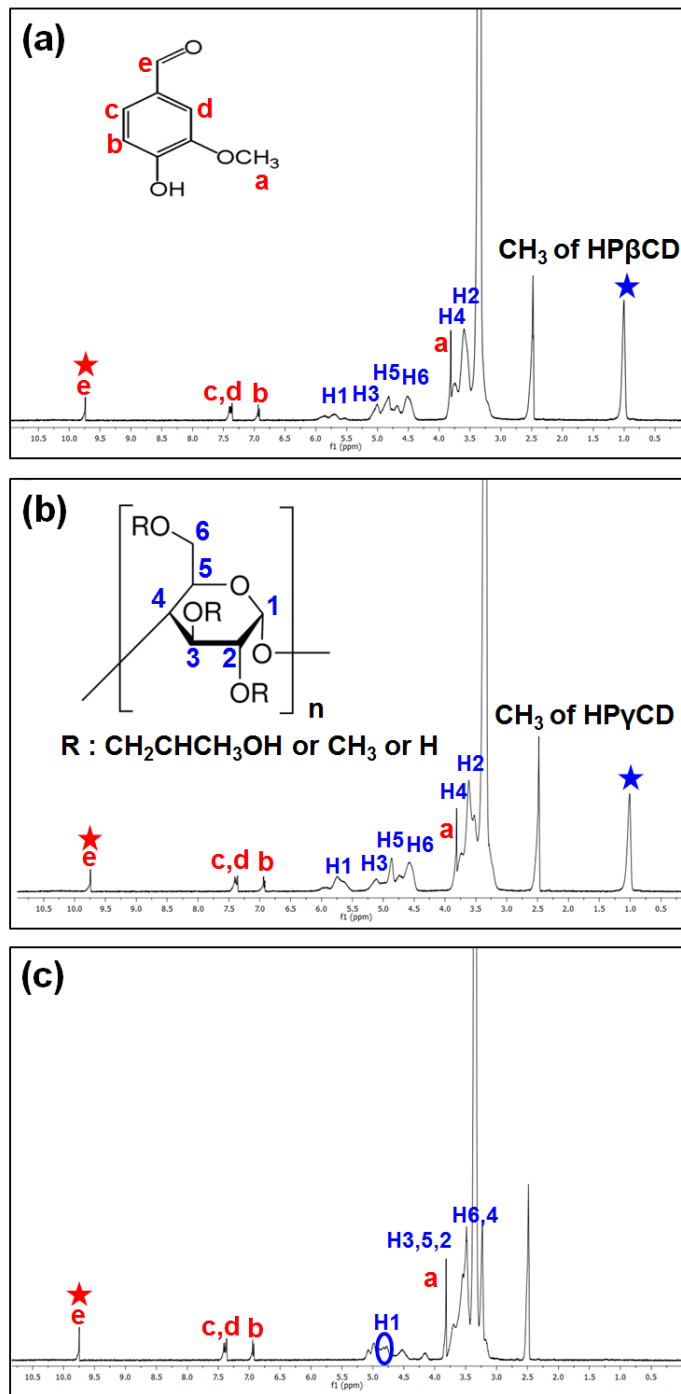

**Figure S1.** Representative  $^1\text{H-NMR}$  spectra of (a) vanillin/HP $\beta$ CD-IC NF, (b) vanillin/HP $\gamma$ CD-IC NF and (c) vanillin/M $\beta$ CD-IC NF obtained in water and dissolved in *d*<sub>6</sub>-DMSO (red and blue stars are assigned for the calculated peak of vanillin and CD, respectively. The protons taken into account for M $\beta$ CD were shown in blue circle).

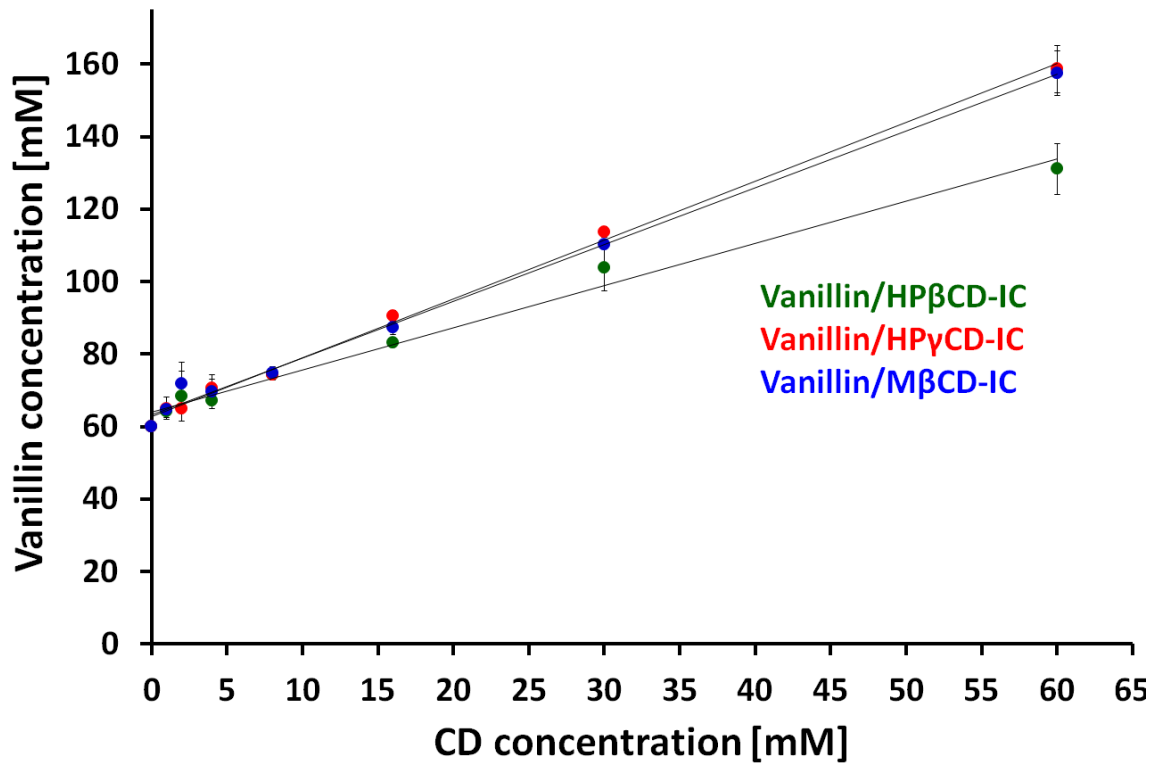

Figure S2. Phase solubility diagram of vanillin/CD systems in water
